# Supplementary material for: A pilot multicentre cluster randomised trial to compare the effect of trauma life support training programmes on patient and provider outcomes
Source: HighWire-hosted journal article supplement (doi:10.1136/bmjopen-2021-057504), 2022-04-01
Supplement: bmjopen-2021-057504supp004_data_supplement.pdf [file bmjopen-2021-057504supp004_data_supplement.pdf]

## Supplemental Material 4

Table S4.1: Variable list.

| Sr No | Variable                            | Description                                                                                          |
|-------|-------------------------------------|------------------------------------------------------------------------------------------------------|
| 1     | patient_id                          | Increment ID in local data base, created by reg_hospital_id, user_id and incremental value           |
| 2     | local_patient_id                    | Hospitals patient ID to track the patient in local charts, not uploaded.                             |
| 3     | reg_hospital_id                     | Assigned ID for the hospital where registration is taking place                                      |
| 4     | referral                            | If patient was referred from another hospital                                                        |
| 5     | ref_hospital_code                   | Type of hospital referred from Public or Private or charitable                                       |
| 6     | pt_age                              | Age of the patient                                                                                   |
| 7     | pt_gender                           | Gender of patient                                                                                    |
| 8     | moi                                 | As defined in ICD-10 codes                                                                           |
| 9     | dominating_injury_type              | Indication of the type of injury produced by the trauma.                                             |
| 10    | arrival_by                          | How did the patient arrive to hospital? (Walking, private car, EMS?)                                 |
| 11    | ed_hr                               | Heart rate recorded in the emergency department.                                                     |
| 12    | ed_sbp                              | Systolic blood pressure in the emergency department.                                                 |
| 13    | ed_dbp                              | Diastolic blood pressure in the emergency department.                                                |
| 14    | ed_gcs                              | Total GCS score recorded in the emergency department.                                                |
| 15    | ed_rr                               | Respiratory rate recorded in the emergency department.                                               |
| 16    | ed_sat                              | Saturation recorded in the emergency department.                                                     |
| 17    | ed_temperature                      | Temperature of patient in the emergency department.                                                  |
| 18    | ed_pupils                           | Pupillary response (Unilateral response, bilateral response, non-responsive unilateral or bilateral) |
| 19    | ed_shock_index                      | hr divided by sbp in the emergency department                                                        |
| 20    | ed_initial_serum_lactate            | Serum lactate as measured in the emergency department(from ABG)                                      |
| 21    | ed_intial_be                        | BE as measured in the emergency department (from ABG)                                                |
| 22    | intubation                          | Endotracheal intubation done Before Arrival/After arrival/No                                         |
| 23    | time_of_intubation                  | Date + time of intubation (Set to 0000-00-00 if unknown, null if not intubated)                      |
| 24    | time_mechanical_ventilation_started | Timestamp, coded 0000-00-00 if unknown time, null if patient was not on mechanical ventilation       |
| 25    | time_mechanical_ventilated_stopped  | Timestamp, coded 0000-00-00 if unknown time, null if patient was not on mechanical ventilation       |
| 26    | chest_tube                          | Time of insertion of Intercostal drain Before Arrival/After arrival/No                               |
| 27    | time_of_chest_tube                  | Date + time of intubation (Set to 0000-00-00 if unknown, null if not placed)                         |
| 28    | vasopressors                        | Yes/No                                                                                               |

Table S4.1: Variable list. (continued)

| Sr No | Variable                         | Description                                                                                                    |
|-------|----------------------------------|----------------------------------------------------------------------------------------------------------------|
| 29    | time_of_vasopressors             | Date + time of intubation (Set to 0000-00-00 if unknown, null if not placed)                                   |
| 30    | num_blood transfusion_within_24h | Number of transfusions given within first 24h                                                                  |
| 31    | fluids_within_24h                | Quantity of fluids in the first 24 hrs (other than blood)                                                      |
| 32    | intervention                     | Other intervention, not defined, free-text (surgical airway, packing of wound, central line, closed reduction) |
| 33    | data_of_injury                   | Date and time when the accident occurred.                                                                      |
| 34    | date_of_transport                | Date and time when the EMS service started transportation from the scene, if applicable.                       |
| 35    | date_of_arrival                  | Date and time of arrival to the emergency department.                                                          |
| 36    | admitted                         | If the patient was admitted to hospital                                                                        |
| 37    | date_of_admission                | Date and time of admission to the emergency department.                                                        |
| 38    | surgery_during_stay              | Yes/No                                                                                                         |
| 39    | date_of_surgery                  | Date and time when the patient was taken to surgery                                                            |
| 40    | date_of_admission_icu            | The time the patient was admitted to the ICU                                                                   |
| 41    | date_of_admission_ward           | The time the patient was admitted to the ward                                                                  |
| 42    | date_of_discharge_icu            | The time the patient was discharged from the ICU                                                               |
| 43    | date_of_discharge_ward           | The time the patient was discharged from the ward                                                              |
| 44    | dialysis_within_30_days          | Did the patient undergo dialysis during the visit                                                              |
| 45    | discharge_alive                  | Yes/No                                                                                                         |
| 46    | alive_after_30_days              | If a 30 day follow up is done, this can be added.                                                              |
| 47    | time_of_death                    | Time of death if the patient died in ED or during hospital stay or after discharge                             |
| 48    | type_of_initial_surgery          | Free text about the surgery                                                                                    |
| 49    | sbp_at_start_of_surgery          | First sbp recorded at start of surgery                                                                         |
| 50    | time_surgery_start               | Time and date when surgery started                                                                             |
| 51    | time_surgery_end                 | Time and date when surgery ended                                                                               |
| 52    | findings_or                      | Findings of during surgery, free text                                                                          |
| 53    | injury_first_or_icd10            | ICD10 codes for found injuries on first surgery                                                                |
| 54    | initial_xray_findings            | First X-ray findings                                                                                           |
| 55    | time_fast                        | Time and date when FAST was done                                                                               |
| 56    | findings_fast                    | Findings on FAST                                                                                               |
| 57    | time_first_ct                    | Time and date when the first CT was done                                                                       |
| 58    | type_first_ct                    | Type of CT, head, abdomen                                                                                      |
| 59    | findings_first_ct                | Findings on first CT scan                                                                                      |
| 60    | injury_first_ct_icd10            | ICD10 code of the injuries found on first CT                                                                   |
| 61    | time_second_ct                   | Time and date when the second CT was done                                                                      |
| 62    | type_second_ct                   | Type of CT, head, abdomen                                                                                      |
| 63    | findings_second_ct               | Findings on second CT scan                                                                                     |
| 64    | injury_second_ct_icd10           | ICD10 code of the injuries found on second CT                                                                  |
| 65    | findings_additional_ct           | Collected findings on following CTs                                                                            |

Table S4.1: Variable list. (continued)

| Sr No | Variable                                   | Description                                                                                                                                                                                                        |
|-------|--------------------------------------------|--------------------------------------------------------------------------------------------------------------------------------------------------------------------------------------------------------------------|
| 66    | injury_following_ct                        | ICD10 code of the injuries found on following CTs                                                                                                                                                                  |
| 67    | injury_external_1                          | Description of found external injuries                                                                                                                                                                             |
| 68    | injury_external_1_icd10                    | ICD10 codes for external injuries                                                                                                                                                                                  |
| 69    | body_surface_burn                          | Burns over body in percent                                                                                                                                                                                         |
| 70    | inhalation_injury                          | If there are any inhalational burns Yes/no                                                                                                                                                                         |
| 71    | co_morbidity_index                         | CCI Charlson Comorbidity Index                                                                                                                                                                                     |
| 72    | occupation                                 | Indicate patient's usual or principal work or business to earn a living                                                                                                                                            |
| 73    | prior_facility_interventions               | Interventions (procedures, medications, diagnostics) administered in a facility prior to arrival at current facility                                                                                               |
| 74    | number_of_serious_injuries                 | Total number of serious injuries as judged by provider                                                                                                                                                             |
| 75    | physician_likely_cause_death               | Likely cause of death as per the treating doctor                                                                                                                                                                   |
| 76    | cause_of_death                             | Patient's official (legal) cause of death                                                                                                                                                                          |
| 77    | complication_pulmonary                     | Measured by identifying new infiltrates/consolidations on X-ray chest or CT scan report suggestive of ARDS, Pneumonia or PTE or diagnosed by a clinician. Patients on mechanical ventilation: Increased FIo2, PEEP |
| 78    | pulmonary_complication_reason              |                                                                                                                                                                                                                    |
| 79    | complication_septic_shock                  | Patients needing inotropic support (dopamine >5 microgram/min/ NA/ Vasopressin) beyond the first 48 hours or new initiation of inotropes in absence of bleeding or diagnosed by a clinician.                       |
| 80    | septic_shock_reason                        |                                                                                                                                                                                                                    |
| 81    | complication_renal_failure                 | Measured by identifying a patient on dialysis or other renal replacement therapy                                                                                                                                   |
| 82    | renal_failure_reason                       |                                                                                                                                                                                                                    |
| 83    | complication_Coagulopathy                  | Measured by transfusion of plasma /platelets Or deranged INR and low platelets                                                                                                                                     |
| 84    | quality_of_life                            | EQ5D & EQ5D Y (for <18 years) questionnaire at discharge and at one month post discharge                                                                                                                           |
| 85    | number_of_hospitalizations_for_this_injury | Count of no of re-hospitalisations (other hospitals or same hospitals) after discharge at home (not transfer)                                                                                                      |
| 86    | return_to_work                             | Return to any kind of work not necessarily same as pre injury                                                                                                                                                      |
| 87    | need_for_reexploration_or_resurgery        | Need for resurgery for the same region for complication or missed injury                                                                                                                                           |
| 88    | failure_of_conservative_management         | Failure of conservative treatment which later needed intervention (radiological/vascular or surgical)                                                                                                              |
| 89    | patient_satisfaction                       | This will be an ordinal scale recording of the overall satisfaction the patient had after discharge.                                                                                                               |
| 90    | cost_of_treatment                          | Direct out-of-pocket costs for treatment to the patient including medicines, diagnostics, equipment, etc.                                                                                                          |

Table S4.1: Variable list. (*continued*)

| Sr No | Variable                                         | Description                                               |
|-------|--------------------------------------------------|-----------------------------------------------------------|
| 91    | selfambulatory_at_discharge                      | Was the patient able to ambulate on his own at discharge, |
| 92    | residents_confidence_in_managing_trauma_patients |                                                           |
