# Supplementary material for: A pilot multicentre cluster randomised trial to compare the effect of trauma life support training programmes on patient and provider outcomes
Source: BMJ Open. 2022 Apr 15;12(4):e057504. doi: 10.1136/bmjopen-2021-057504 (PMC9016405; doi:10.1136/bmjopen-2021-057504)
Supplement: Supplementary data [file bmjopen-2021-057504supp007.pdf]

## Supplemental Material 7

Table S7.1: Shows which outcomes that will be assessed in which subgroups.

|                                                                                          | All patients | Men | Women | Blunt multisystem | Penetrating | Shock | Severe traumatic brain injury | Elderly |
|------------------------------------------------------------------------------------------|--------------|-----|-------|-------------------|-------------|-------|-------------------------------|---------|
| All cause mortality within 30 days from the time of arrival to the emergency department  | Yes          | Yes | Yes   | Yes               | Yes         | Yes   | Yes                           | Yes     |
| All cause mortality within 24 hours from the time of arrival to the emergency department | Yes          | Yes | Yes   | Yes               | Yes         | Yes   | Yes                           | Yes     |
| Time to all cause mortality during follow up.                                            | Yes          | Yes | Yes   | Yes               | Yes         | Yes   | Yes                           | Yes     |
| Cause-specific in-hospital mortality.                                                    | Yes          | Yes | Yes   | Yes               | Yes         | Yes   | Yes                           | Yes     |
| Adherence to the WHO trauma care checklist.                                              | Yes          | Yes | Yes   | Yes               | Yes         | Yes   | Yes                           | Yes     |
| Fluids for resuscitation in first one hour in patients.                                  | Yes          | No  | No    | No                | No          | Yes   | No                            | No      |

Table S7.1: Shows which outcomes that will be assessed in which subgroups.  
(continued)

|                                                                                                                                                                                   | All patients | Men | Women | Blunt multisystem | Penetrating | Shock | Severe traumatic brain injury | Elderly |
|-----------------------------------------------------------------------------------------------------------------------------------------------------------------------------------|--------------|-----|-------|-------------------|-------------|-------|-------------------------------|---------|
| Massive transfusion, defined as four or more units of packed red blood cells, plasma or platelets transfused within the first 24 hours after arrival to the emergency department. | Yes          | No  | No    | No                | No          | Yes   | No                            | No      |
| Time to first surgery.                                                                                                                                                            | Yes          | No  | No    | No                | No          | Yes   | No                            | No      |
| Time to first intubation.                                                                                                                                                         | Yes          | No  | No    | No                | No          | No    | No                            | No      |
| Time to CT scan.                                                                                                                                                                  | Yes          | No  | No    | No                | No          | No    | No                            | No      |
| Ventilator free days.                                                                                                                                                             | Yes          | No  | No    | No                | No          | No    | No                            | No      |
| ICU free days.                                                                                                                                                                    | Yes          | No  | No    | No                | No          | No    | No                            | No      |
| Pulmonary complications.                                                                                                                                                          | Yes          | No  | No    | No                | No          | No    | No                            | No      |
| Septic shock.                                                                                                                                                                     | Yes          | No  | No    | No                | No          | No    | No                            | No      |
| Renal failure.                                                                                                                                                                    | Yes          | No  | No    | No                | No          | No    | No                            | No      |
| Coagulopathy.                                                                                                                                                                     | Yes          | No  | No    | No                | No          | No    | No                            | No      |
| Length of stay.                                                                                                                                                                   | Yes          | No  | No    | No                | No          | No    | No                            | No      |
| Quality of life.                                                                                                                                                                  | Yes          | No  | No    | No                | No          | No    | No                            | No      |
| Number of hospitalizations after the index admission during the follow up period.                                                                                                 | Yes          | No  | No    | No                | No          | No    | No                            | No      |
| Return to work.                                                                                                                                                                   | Yes          | Yes | Yes   | Yes               | Yes         | Yes   | Yes                           | No      |

Table S7.1: Shows which outcomes that will be assessed in which subgroups.  
(continued)

|                                      | All patients | Men | Women | Blunt multisystem | Penetrating | Shock | Severe traumatic brain injury | Elderly |
|--------------------------------------|--------------|-----|-------|-------------------|-------------|-------|-------------------------------|---------|
| Need for unplanned re-exploration.   | Yes          | No  | No    | No                | No          | No    | No                            | No      |
| Failure of non-operative management. | Yes          | No  | No    | No                | No          | No    | No                            | No      |
| Patient satisfaction.                | Yes          | Yes | Yes   | Yes               | No          | No    | No                            | No      |
| Out-of-pocket expenditure.           | Yes          | No  | No    | No                | No          | No    | No                            | No      |
| Self-ambulatory.                     | Yes          | No  | No    | No                | No          | No    | No                            | No      |
